# Supplementary material
Source: ML conference proceedings conference paper supplement (https://openreview.net/forum?id=yD7oAhFEtD)

# Relative MSE for Different k Values

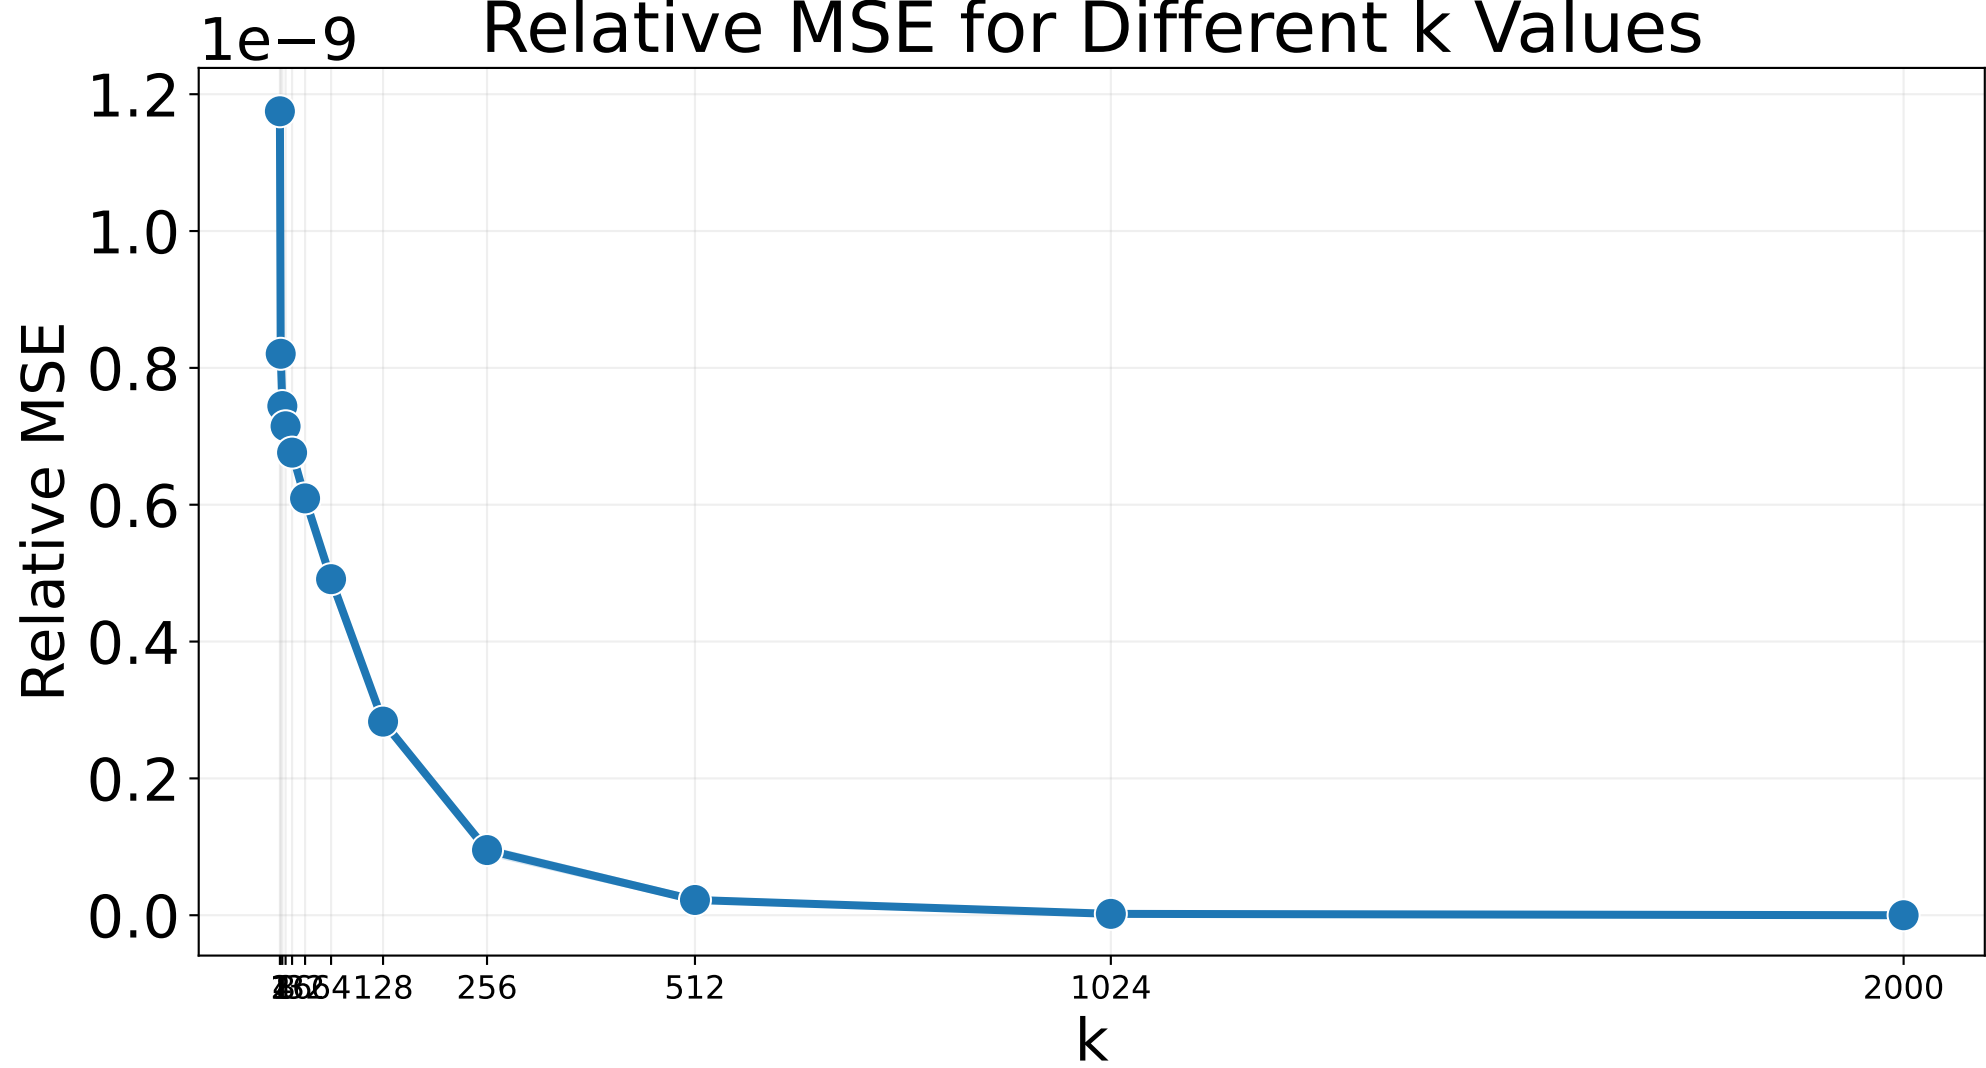

Supplement: supplementary_material [file attachment]

# Relative Diff for Different k Values

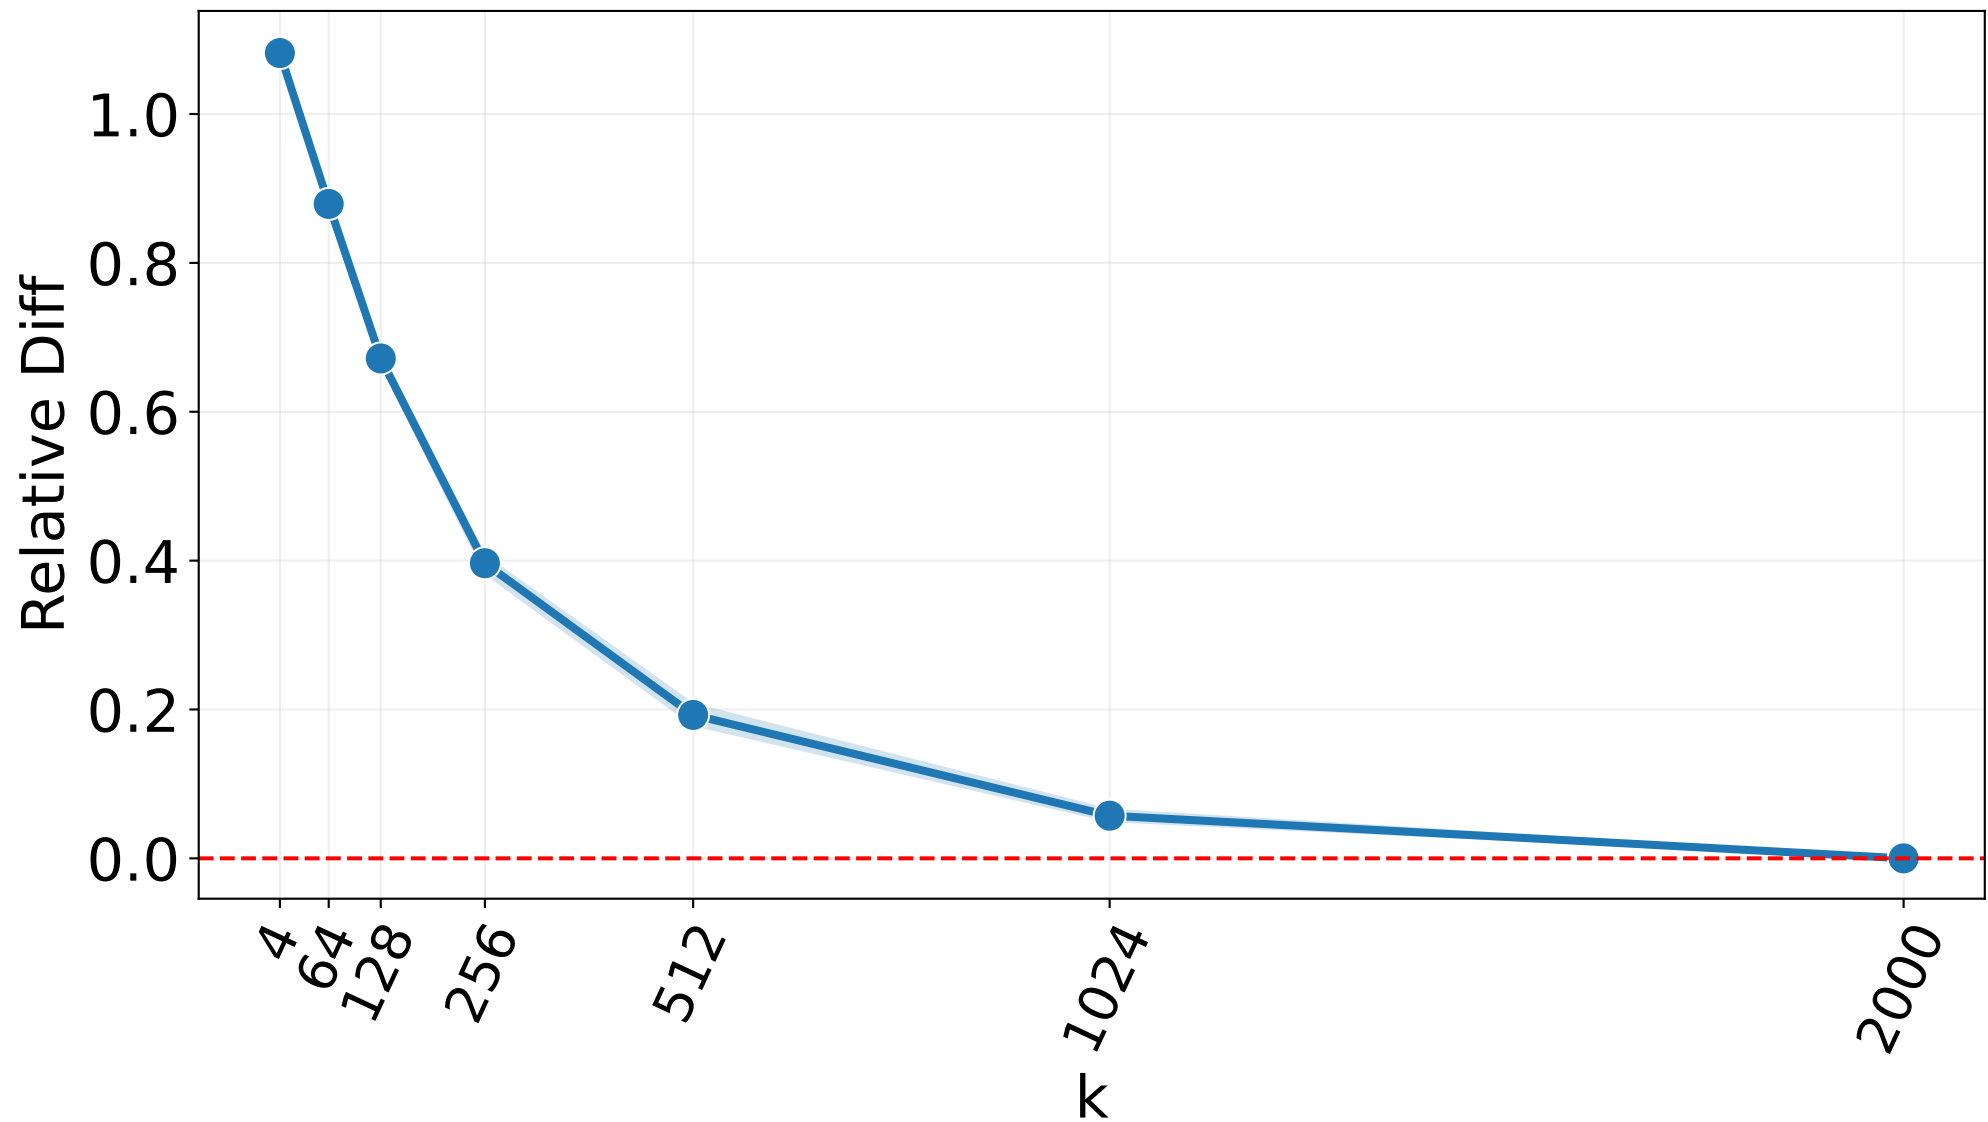

Supplement: supplementary_material [file attachment]

# Acc for Different k Values

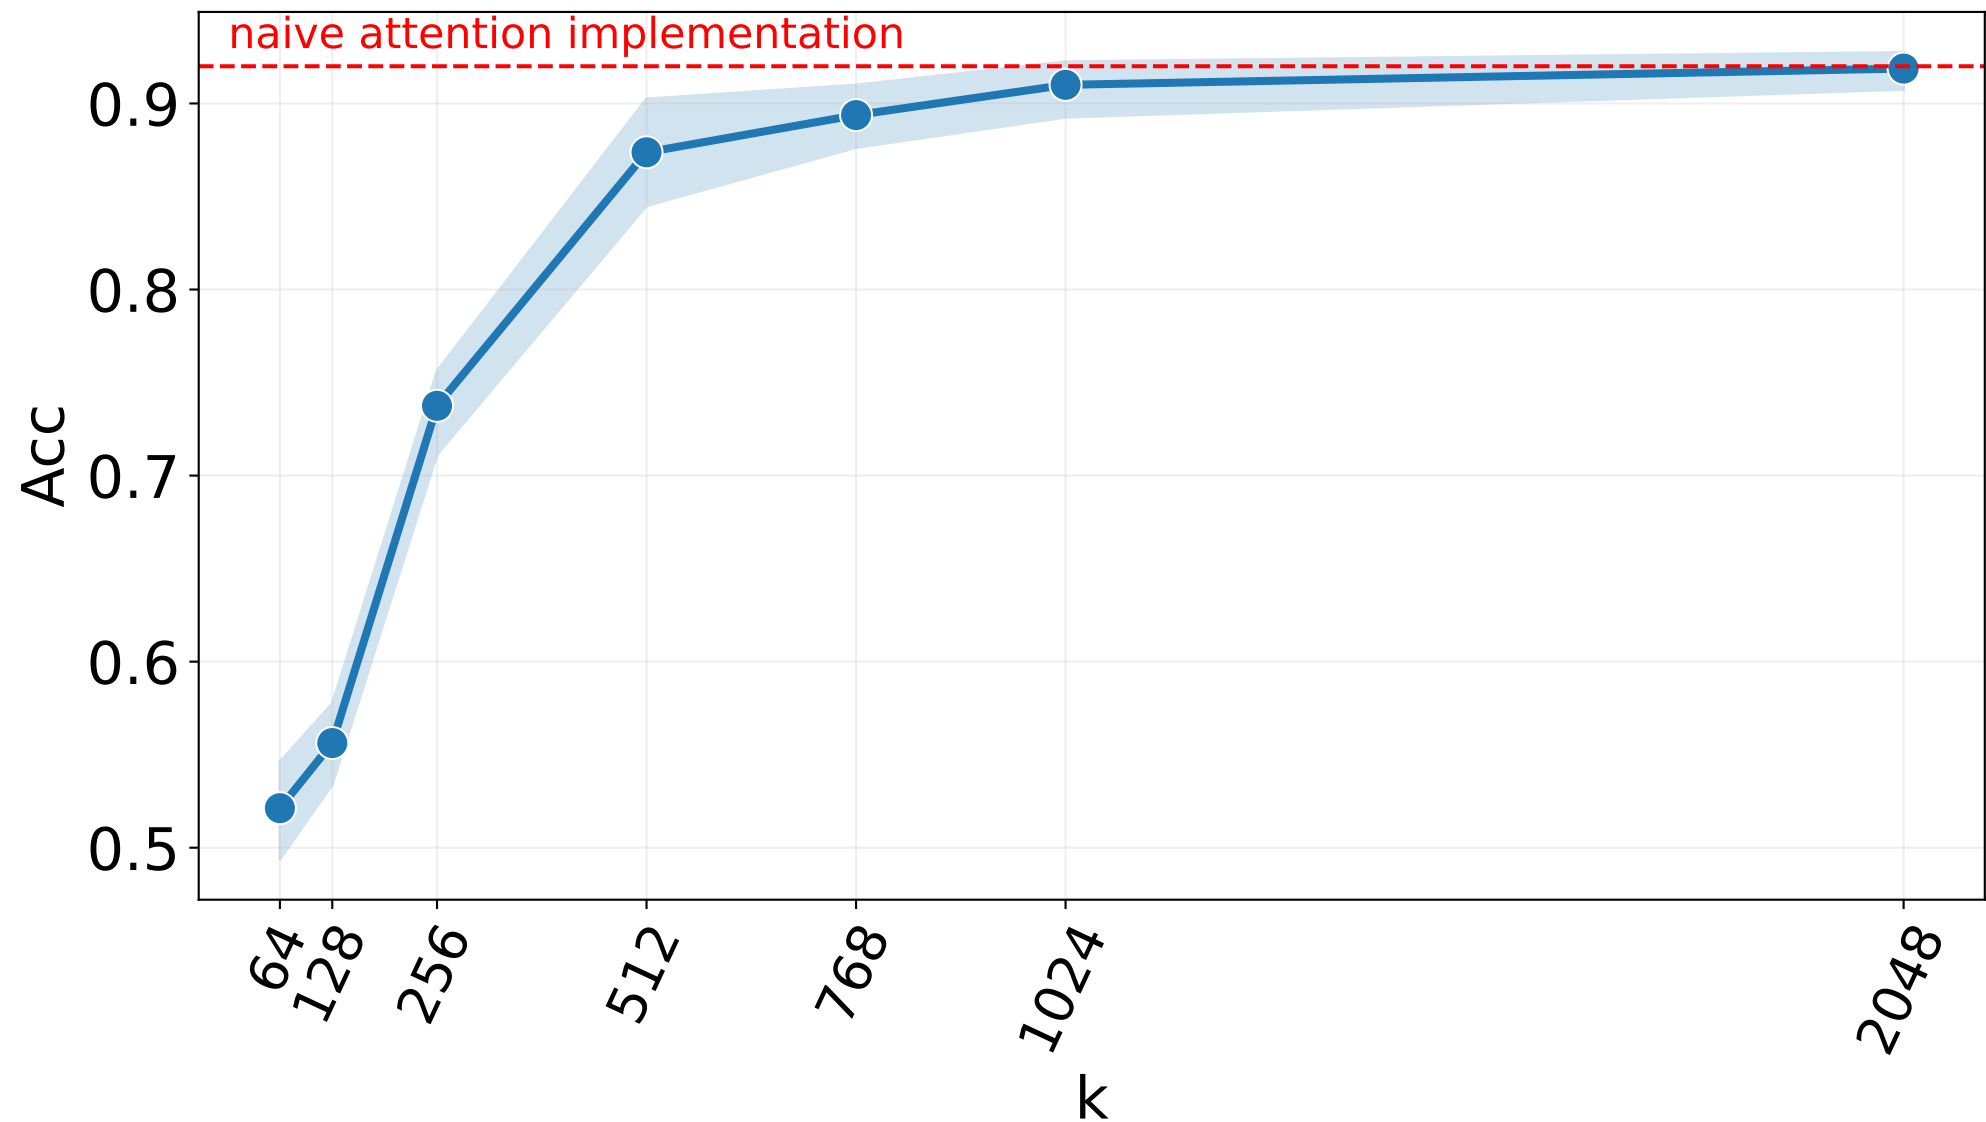

Supplement: supplementary_material [file attachment]
